# Supplementary material
Source: publisher site journal article supplement (https://www.dovepress.com/article/257204)
Supplement: Supplementary file 1 [file get_supplementary_file.php]

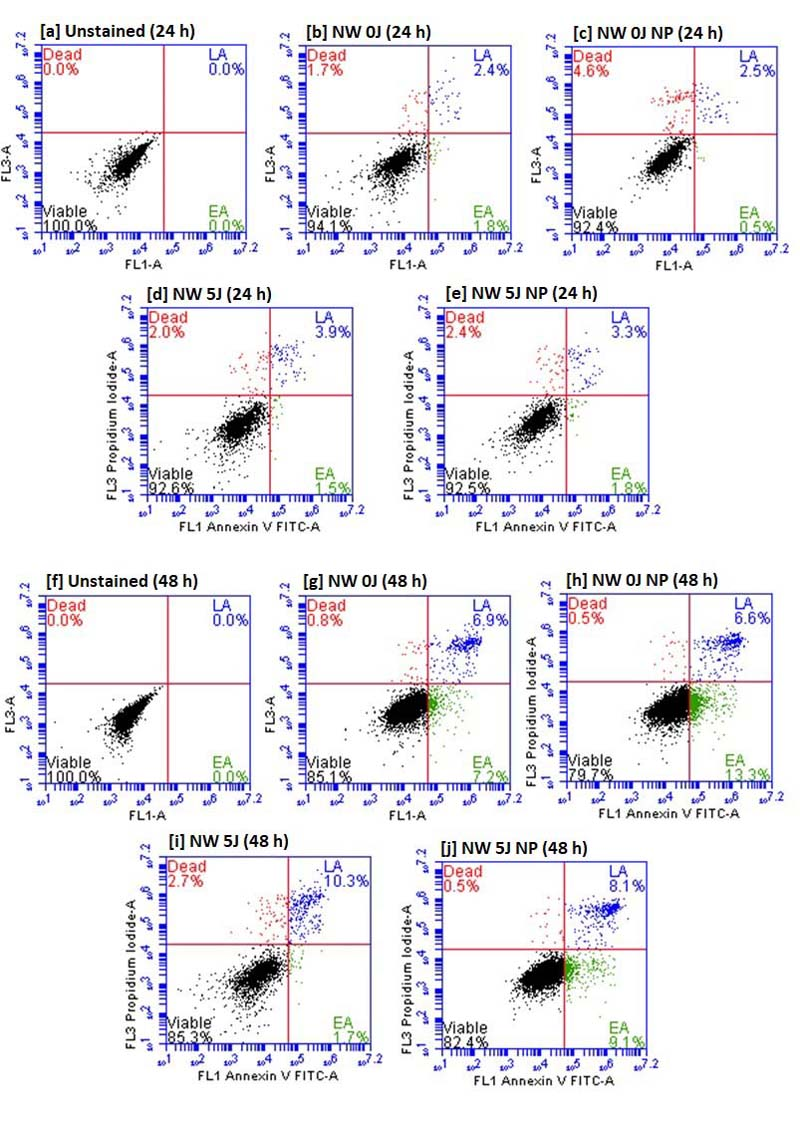


**Figure S1** FITC Annexin V/PI apoptosis assay by flow cytometry. Non-irradiated normal wounded (NW 0J); non-irradiated, G-AgNP treated normal wounded (NW 0J NP); irradiated normal wounded (NW 5J); and irradiated, G-AgNP treated normal wounded (NW 5J NP) WS1 cells were analysed at 24 h (hours) [a, b, c, d and e] and 48 h [f, g, h, i, and j]. PI = Propidium iodide; G-AgNP = Green-synthesized silver nanoparticle.


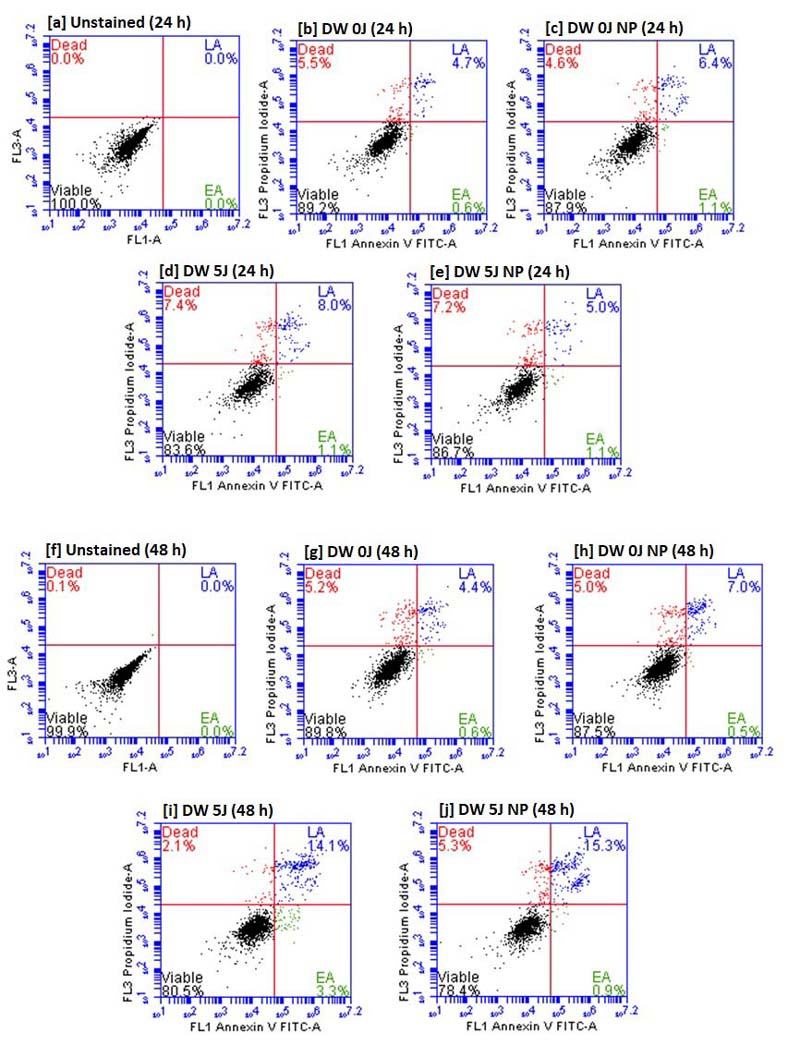


**Figure S2** FITC Annexin V/PI apoptosis assay by flow cytometry. Non-irradiated diabetic wounded (DW 0J); non-irradiated G-AgNP treated diabetic wounded (DW 0J NP); irradiated diabetic wounded (DW 5J); and irradiated G-AgNP treated diabetic wounded (DW 5J NP) WS1 cells were analysed at 24 h (hours) [a, b, c, d and e] and 48 h [f, g, h, i, and j]. PI = Propidium iodide; G-AgNP = Green-synthesized silver nanoparticle.
